# Supplementary material for: Multidimensional data analysis revealed thyroiditis-associated TCF19 SNP rs2073724 as a highly ranked protective variant in thyroid cancer
Source: publisher site journal article supplement (doi:10.18632/aging.205718), 2024-04-04
Supplement: Supplementary file [file aging-v16i7-205718-supplementary-material-SD2.pdf]

## SUPPLEMENTARY TABLE

Supplementary Table 1. List of primers.

| Gene                 | Forward primer           | Reverse primer          |
|----------------------|--------------------------|-------------------------|
| Human $\beta$ -actin | CACCATTGGCAATGAGCGGTTC   | AGGTCTTTGCGGATGTCCACGT  |
| Human TCF19          | TCAGCCTGGAAGACCACAGCAG   | CCAAAGGTCAGGAGGTCTCCAT  |
| Human CSF3           | TCCAGGAGAAGCTGGTGAGTGA   | CGCTATGGAGTTGGCTCAAGCA  |
| Human SRSF6          | GTGCTTTGGACAAACTGGATGGC  | CTCCTACTTCGTGACCGTCTTC  |
| Human NCOA5          | AGATTCACCGCTCCTGCACAGT   | CTGTCTGGCAATCTCCTCACGT  |
| Human IL1B           | CCACAGACCTTCCAGGAGAATG   | GTGCAGTTCAGTGATCGTACAGG |
| Human NFE2           | GGAGAGATGGAAGTACTGACTGGC | GAATCTGGGTGGATTGAGCAGG  |
| Human MAT2A          | CTGGCAGAACTACGCCGTAATG   | GTGTGGACTCTGATGGGAAGCA  |
| Human TXNIP          | CAGCAGTGCAAACAGACTTCGG   | CTGAGGAAGCTCAAAGCCGAAC  |
| Human GALNT3         | CACCTGCAATACTGCTGAAGG    | ACAGAGGTTCTAGCCAACCAT   |
| Human SRSF6 Primer 1 | GGTTCCTTCCTCCATCTTCAAAGC | AGAGCCACAGTCAGAGAAGCAG  |
| Human SRSF6 Primer 2 | GCGGTCCAGCCAGCAGTG       | GGGTGACAAAGCAAGACTCCAAC |
| Human SRSF6 Primer 3 | GATAGCCCAATCCACAAGTGAGTC | CCGCCGACATCAGCCTCTC     |
| Human SRSF6 Primer 4 | CTGCGGCTGGATTAGAGACATTG  | CCCTGGGCTAGATGGTGACTG   |
| Human SRSF6 Primer 5 | GCCGCCTCCTCGAAGTAGAC     | CCGCTTCTTTCCTTGGAGAGTTC |
